# Supplementary material
Source: publisher site journal article supplement (https://www.dovepress.com/article/353573)
Supplement: Supplementary file 2 [file 353573-revised-supplementary-material.pdf › 353573-revised-supplementary-material.pdf]

**Electronic Supplementary Material:** PANINI Questionnaires (Dutch language)

**Manuscript Title:** Knowledge of nutrition and physical activity guidelines is not associated with physical function in Dutch older adults

# Invulformulier

## TEST UW VITALITEIT!

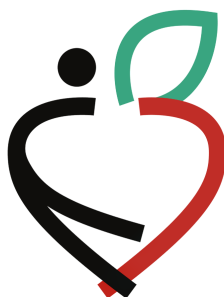

# PANINI

### Gegevens deelnemer

Naam .....

Adres .....

Telefoonnummer .....

Mobiel nummer .....

E-mailadres .....

### Checklist testbegeleider:

- Samenvatting onderzoek geven aan deelnemer
- Vraag of alles helder is en of de deelnemer mee wilt doen
- Teken toestemmingsformulier** (volgende pagina), bewaar **1<sup>e</sup> twee bladzijden** en doe deze in de map.

Stuur **deelnemer naar het eerste station** met vragenlijst en scoreformulier.

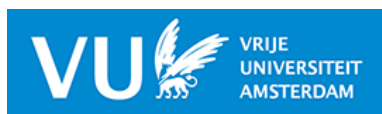

# Informatiebrief

Geachte heer, mevrouw,

Hartelijk dank dat u interesse heeft om mee te werken aan het onderzoek over gezond ouder worden, vitaliteit en in het bijzonder uw kennis daarover. Onderzoek naar gezond ouder worden heeft onze volle aandacht; voor gedegen onderzoek hiernaar is het van belang te weten wat u al weet!

## Wat wordt er gemeten?

U krijgt een vragenlijst met vragen over uw algemene gezondheid en kennis over de bestaande richtlijnen gericht op voeding en beweging. Daarnaast meten wij uw vitaliteit: dit doen wij door uw spierkracht en loopsnelheid te meten. Alle testen bij elkaar duren ongeveer 30 minuten.

## Is deelname vrijwillig?

Uw deelname aan het onderzoek is geheel vrijwillig en zonder verplichtingen. Als u meedoet aan het onderzoek, dan heeft u het recht om op elk gewenst moment, zonder opgave van redenen, van verdere deelname af te zien.

## Wat zijn de voor- en nadelen?

- U ondergaat gedurende ongeveer 20 minuten een aantal testen die iets zeggen over uw vitaliteit en algemene gezondheid.
- U ontvangt hierover een schriftelijk rapport, dit wordt naar u opgestuurd.
- Behalve inzicht in uw eigen vitaliteit heeft het onderzoek voor u niet direct voordelen. U helpt hiermee wel de wetenschap.

## Hoe wordt er omgegaan met u gegevens?

De gegevens die tijdens dit onderzoek worden verzameld, zullen strikt vertrouwelijk behandeld worden. Al uw gegevens krijgen een codenummer en de gegevens worden anoniem verwerkt. Wij zijn verplicht om deze gegevens 15 jaar te bewaren.

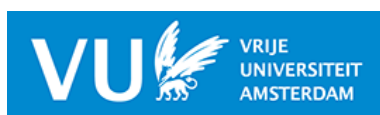

### **Ondertekening toestemmingsformulier**

Als u besluit deel te nemen aan het onderzoek, vragen wij u een toestemmingsformulier in te vullen. Hiermee bevestigt u uw voornemen om aan het onderzoek mee te werken. U blijft altijd de vrijheid houden om, zonder opgave van redenen, uw deelname te beëindigen.

### **Nadere informatie**

Indien u nu of later nog vragen over het onderzoek heeft of mondelinge toelichting wenst dan kunt u zich richten tot het secretariaat Bewegingswetenschappen via T: (020) 59 82000.

Hartelijk dank voor uw medewerking.

Met vriendelijke groet,

Prof. dr. dr. Andrea B. Maier

Vrije Universiteit Amsterdam  
Sectie Neuromechanics, Faculteit der Gedrags- en Bewegingswetenschappen  
Van der Boechorststraat 9  
1081 BT Amsterdam  
E-mail: [PANINI.fgb@vu.nl](mailto:PANINI.fgb@vu.nl)

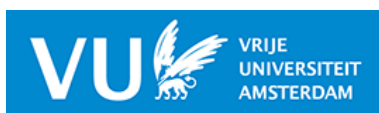

## Toestemmingsformulier (voor deelnemer)

*In te vullen door de deelnemer*

- Ik verklaar op een voor mij duidelijke wijze, mondeling en schriftelijk, te zijn ingelicht over de aard, methode, doel en de risico's en belasting van het onderzoek. Mijn vragen zijn naar tevredenheid beantwoord.
- Ik weet dat de gegevens en resultaten van het onderzoek alleen anoniem en vertrouwelijk aan derden bekend gemaakt zullen worden.
- Ik begrijp dat mijn deelname vrijwillig is en dat ik te allen tijde zonder opgave van reden kan stoppen. Bij vroegtijdig stoppen, zullen de tot dan toe verzamelde gegevens gebruikt worden om het beweegadvies te geven.
- Ik stem in met deelname aan dit onderzoek.

Kruis aan indien van toepassing

- Ik geef toestemming aan de onderzoekers om mij na afloop van dit onderzoek opnieuw te benaderen voor vergelijkbaar onderzoek.

Naam deelnemer: .....

Datum: ..... Handtekening deelnemer: .....

---

*In te vullen door de uitvoerende onderzoeker*

Ik heb een mondelinge en schriftelijke toelichting gegeven op het onderzoek. Ik zal resterende vragen over het onderzoek naar vermogen beantwoorden. De deelnemer zal van een eventuele voortijdige beëindiging van deelname aan dit onderzoek geen nadelige gevolgen ondervinden.

Naam onderzoeker: .....

Datum: ..... Handtekening onderzoeker: .....



## Toestemmingsformulier (voor onderzoeker)

*In te vullen door de deelnemer*

- Ik verklaar op een voor mij duidelijke wijze, mondeling en schriftelijk, te zijn ingelicht over de aard, methode, doel en de risico's en belasting van het onderzoek. Mijn vragen zijn naar tevredenheid beantwoord.
- Ik weet dat de gegevens en resultaten van het onderzoek alleen anoniem en vertrouwelijk aan derden bekend gemaakt zullen worden.
- Ik begrijp dat mijn deelname vrijwillig is en dat ik te allen tijde zonder opgaaf van reden kan stoppen. Bij vroegtijdig stoppen, zullen de tot dan toe verzamelde gegevens gebruikt worden om het beweegadvies te geven.
- Ik stem in met deelname aan dit onderzoek.

Kruis aan indien van toepassing

- Ik geef toestemming aan de onderzoekers om mij na afloop van dit onderzoek opnieuw te benaderen voor vergelijkbaar onderzoek.

Naam deelnemer: .....

Datum: ..... Handtekening deelnemer: .....

---

*In te vullen door de uitvoerende onderzoeker*

Ik heb een mondelinge en schriftelijke toelichting gegeven op het onderzoek. Ik zal resterende vragen over het onderzoek naar vermogen beantwoorden. De deelnemer zal van een eventuele voortijdige beëindiging van deelname aan dit onderzoek geen nadelige gevolgen ondervinden.

Naam onderzoeker: .....

Datum: ..... Handtekening onderzoeker: .....



| <b>VRAGENLIJST</b>                                                                                                                                   |                                                                                                                                                                                                                                                                                                                           |
|------------------------------------------------------------------------------------------------------------------------------------------------------|---------------------------------------------------------------------------------------------------------------------------------------------------------------------------------------------------------------------------------------------------------------------------------------------------------------------------|
| <b>1. Wat is uw geboortedatum?</b>                                                                                                                   | Dag/maand/jaar <input type="text"/> <input type="text"/> / <input type="text"/> <input type="text"/> / <input type="text"/> <input type="text"/> <input type="text"/> <input type="text"/>                                                                                                                                |
| <b>2. U bent?</b>                                                                                                                                    | 1. <input type="checkbox"/> Vrouw    2. <input type="checkbox"/> Man                                                                                                                                                                                                                                                      |
| <b>3. Wat is uw huidige burgerlijke staat?</b>                                                                                                       | 1. <input type="checkbox"/> Alleenstaand<br>2. <input type="checkbox"/> Getrouwd<br>3. <input type="checkbox"/> Gescheiden<br>4. <input type="checkbox"/> Weduwe/Weduwenaar                                                                                                                                               |
| <b>4. Wat is uw hoogst genoten opleiding?</b>                                                                                                        | 1. <input type="checkbox"/> Basisonderwijs<br>2. <input type="checkbox"/> Middelbaar onderwijs<br>3. <input type="checkbox"/> MBO of vakschool<br>4. <input type="checkbox"/> HBO/Universiteit                                                                                                                            |
| <b>5. Hoeveel jaar bent u naar school gegaan?</b>                                                                                                    | <input type="text"/> <input type="text"/> jaar                                                                                                                                                                                                                                                                            |
| <b>6. Wat doet/deed u voor werk?</b>                                                                                                                 | .....<br>.....                                                                                                                                                                                                                                                                                                            |
| <b>7. Met wie woont u samen?*</b><br><i>* U kunt meerdere antwoorden aankruisen.</i>                                                                 | 1. <input type="checkbox"/> Ik woon alleen<br>2. <input type="checkbox"/> Met een partner<br>3. <input type="checkbox"/> Met kinderen<br>4. <input type="checkbox"/> Met broers/zussen<br>5. <input type="checkbox"/> Anders, namelijk.....<br>.....                                                                      |
| <b>8. Hoe woont u?</b>                                                                                                                               | 1. <input type="checkbox"/> Thuis (zelfstandig)<br>2. <input type="checkbox"/> Thuis (met mantelzorg/thuiszorg)<br>3. <input type="checkbox"/> Seniorenappartement<br>4. <input type="checkbox"/> Aanleunwoning<br>5. <input type="checkbox"/> Verpleeghuis<br>6. <input type="checkbox"/> Anders, namelijk.....<br>..... |
| <b>9. Medische voorgeschiedenis</b><br>Welke van de volgende ziekten/aandoeningen heeft u (gehad)*?<br><i>*U kunt meerdere antwoorden aankruisen</i> | <input type="checkbox"/> Diabetes (suikerziekte) type 1<br><input type="checkbox"/> Diabetes (suikerziekte) type 2<br><input type="checkbox"/> Hoge bloeddruk                                                                                                                                                             |

|                                                                                                                           |                                                                                                                                                                                                                                                                                                                                                                                                                                                                                                                                                                                                                                                                                   |
|---------------------------------------------------------------------------------------------------------------------------|-----------------------------------------------------------------------------------------------------------------------------------------------------------------------------------------------------------------------------------------------------------------------------------------------------------------------------------------------------------------------------------------------------------------------------------------------------------------------------------------------------------------------------------------------------------------------------------------------------------------------------------------------------------------------------------|
|                                                                                                                           | <input type="checkbox"/> Hoog cholesterol<br><input type="checkbox"/> Kanker, vorm: .....<br><input type="checkbox"/> COPD/longemfyseem<br><input type="checkbox"/> Astma<br><input type="checkbox"/> Hersenbloeding of infarct (CVA)<br><input type="checkbox"/> Hartinfarct<br><input type="checkbox"/> Epilepsie<br><input type="checkbox"/> Ziekte van Parkinson<br><input type="checkbox"/> Staar<br><input type="checkbox"/> Nierfalen<br><input type="checkbox"/> Reuma<br><input type="checkbox"/> Artrose<br><input type="checkbox"/> Schildklierproblemen<br><input type="checkbox"/> Depressie<br><input type="checkbox"/> Anders, namelijk<br>.....<br>.....<br>..... |
| <b>10. Gebruikt u dagelijks medicijnen? Zo ja, hoe veel? U hoeft vitaminen en andere supplementen niet mee te tellen.</b> | 1. <input type="checkbox"/> Ja, namelijk: <input type="checkbox"/> <input type="checkbox"/> medicijnen<br>2. <input type="checkbox"/> Nee                                                                                                                                                                                                                                                                                                                                                                                                                                                                                                                                         |
| <b>11. Gebruikt u vitaminen of andere supplementen? Zo ja, welke?</b>                                                     | Ja, ik gebruik.....<br>.....<br>.....<br>.....<br><input type="checkbox"/> Nee, ik gebruik geen vitaminen of andere supplementen.                                                                                                                                                                                                                                                                                                                                                                                                                                                                                                                                                 |
| <b>12. Rookt u?</b>                                                                                                       | 1. <input type="checkbox"/> Ja, namelijk: <input type="checkbox"/> <input type="checkbox"/> sigaretten per dag.<br>2. <input type="checkbox"/> Nee, nooit gedaan.<br>3. <input type="checkbox"/> Nee, ik ben gestopt in <input type="checkbox"/> <input type="checkbox"/> <input type="checkbox"/> <input type="checkbox"/> (jaartal)                                                                                                                                                                                                                                                                                                                                             |
| <b>13. Drinkt u alcohol?</b>                                                                                              | 1. <input type="checkbox"/> Ja, ik drink <input type="checkbox"/> <input type="checkbox"/> glazen per week<br>2. <input type="checkbox"/> Nee                                                                                                                                                                                                                                                                                                                                                                                                                                                                                                                                     |

| VRAGENLIJST - VOEDING                                                                                                                                                                                                        |                                                                                                                                                                                                                                           |                          |                          |                          |
|------------------------------------------------------------------------------------------------------------------------------------------------------------------------------------------------------------------------------|-------------------------------------------------------------------------------------------------------------------------------------------------------------------------------------------------------------------------------------------|--------------------------|--------------------------|--------------------------|
| <b>14. Kent u de Schijf van Vijf?</b>                                                                                                                                                                                        | 1. <input type="checkbox"/> Ja<br>2. <input type="checkbox"/> Nee → Ga dan naar <b>vraag 20.</b>                                                                                                                                          |                          |                          |                          |
| <b>15. Toen u voor het eerst van de Schijf van Vijf hoorde, wat heeft u toen met uw voedingspatroon gedaan?</b>                                                                                                              | 1. <input type="checkbox"/> Ik heb mijn voedingspatroon aanzienlijk veranderd.<br>2. <input type="checkbox"/> Ik heb mijn voedingspatroon enigszins veranderd.<br>3. <input type="checkbox"/> Ik heb mijn voedingspatroon niet veranderd. |                          |                          |                          |
| <b>16. Vindt u dat u zich houdt aan de Schijf van Vijf?</b>                                                                                                                                                                  | 1. <input type="checkbox"/> Ja → Ga dan naar <b>vraag 19.</b><br>2. <input type="checkbox"/> Nee                                                                                                                                          |                          |                          |                          |
| <b>17. Denkt u dat het voor u mogelijk is om te eten volgens de Schijf van Vijf?</b>                                                                                                                                         | 1. <input type="checkbox"/> Ja, helemaal<br>2. <input type="checkbox"/> Ja, maar dit vergt wel moeite<br>3. <input type="checkbox"/> Nee                                                                                                  |                          |                          |                          |
| <b>18. Als u volgens de Schijf van Vijf zou gaan eten, denkt u dat u daar dan gezondheidsvoordeel aan heeft?</b><br><i>Ga naar <b>vraag 20.</b></i>                                                                          | 1. <input type="checkbox"/> Ja<br>2. <input type="checkbox"/> Nee<br>3. <input type="checkbox"/> Weet ik niet                                                                                                                             |                          |                          |                          |
| <b>19. Heeft u baat bij een voedingspatroon volgens de Schijf van Vijf?</b>                                                                                                                                                  | 1. <input type="checkbox"/> Ja<br>2. <input type="checkbox"/> Nee                                                                                                                                                                         |                          |                          |                          |
| <b>20. Waar kan een persoon in het algemeen het beste meer, dezelfde hoeveelheid of minder van eten, om een gezond voedingspatroon na te streven? Beoordeel de volgende producten:</b><br><i>Zet één kruisje per product</i> |                                                                                                                                                                                                                                           |                          |                          |                          |
|                                                                                                                                                                                                                              | Meer                                                                                                                                                                                                                                      | Hetzelfde                | Minder                   | Weet ik niet             |
| Fruit                                                                                                                                                                                                                        | <input type="checkbox"/>                                                                                                                                                                                                                  | <input type="checkbox"/> | <input type="checkbox"/> | <input type="checkbox"/> |
| Eten en drinken met toegevoegde suikers                                                                                                                                                                                      | <input type="checkbox"/>                                                                                                                                                                                                                  | <input type="checkbox"/> | <input type="checkbox"/> | <input type="checkbox"/> |
| Groente                                                                                                                                                                                                                      | <input type="checkbox"/>                                                                                                                                                                                                                  | <input type="checkbox"/> | <input type="checkbox"/> | <input type="checkbox"/> |
| Vet voedsel                                                                                                                                                                                                                  | <input type="checkbox"/>                                                                                                                                                                                                                  | <input type="checkbox"/> | <input type="checkbox"/> | <input type="checkbox"/> |
| Rood vlees                                                                                                                                                                                                                   | <input type="checkbox"/>                                                                                                                                                                                                                  | <input type="checkbox"/> | <input type="checkbox"/> | <input type="checkbox"/> |
| Granen                                                                                                                                                                                                                       | <input type="checkbox"/>                                                                                                                                                                                                                  | <input type="checkbox"/> | <input type="checkbox"/> | <input type="checkbox"/> |

|                                                                                                                                                                    | Meer                                                                                                                                                                                                             | Hetzelfde                                 | Minder                                | Weet ik niet             |
|--------------------------------------------------------------------------------------------------------------------------------------------------------------------|------------------------------------------------------------------------------------------------------------------------------------------------------------------------------------------------------------------|-------------------------------------------|---------------------------------------|--------------------------|
| Zout                                                                                                                                                               | <input type="checkbox"/>                                                                                                                                                                                         | <input type="checkbox"/>                  | <input type="checkbox"/>              | <input type="checkbox"/> |
| Water                                                                                                                                                              | <input type="checkbox"/>                                                                                                                                                                                         | <input type="checkbox"/>                  | <input type="checkbox"/>              | <input type="checkbox"/> |
| <b>21. Wat adviseren diëtisten met betrekking tot de volgende typen vet?</b>                                                                                       |                                                                                                                                                                                                                  |                                           |                                       |                          |
| Verzadigde vetten                                                                                                                                                  | <input type="checkbox"/> Minder eten                                                                                                                                                                             | <input type="checkbox"/> Niet minder eten | <input type="checkbox"/> Weet ik niet |                          |
| Onverzadigde vetten                                                                                                                                                | <input type="checkbox"/> Minder eten                                                                                                                                                                             | <input type="checkbox"/> Niet minder eten | <input type="checkbox"/> Weet ik niet |                          |
| Trans vetten                                                                                                                                                       | <input type="checkbox"/> Minder eten                                                                                                                                                                             | <input type="checkbox"/> Niet minder eten | <input type="checkbox"/> Weet ik niet |                          |
| <b>22. Welke vetrijke producten worden door diëtisten aangeraden om een gezond voedingspatroon na te streven?*</b><br><i>*U mag meerdere antwoorden aanvinken.</i> | <input type="checkbox"/> Boter<br><input type="checkbox"/> Plantaardige olie<br><input type="checkbox"/> Harde margarines<br><input type="checkbox"/> Zachte margarines<br><input type="checkbox"/> Weet ik niet |                                           |                                       |                          |
| <b>23. Denkt u dat de volgende producten een goede bron voor eiwitten zijn?</b>                                                                                    |                                                                                                                                                                                                                  |                                           |                                       |                          |
| Gevogelte                                                                                                                                                          | <input type="checkbox"/> Goede bron                                                                                                                                                                              | <input type="checkbox"/> Geen goede bron  | <input type="checkbox"/> Weet ik niet |                          |
| Kaas                                                                                                                                                               | <input type="checkbox"/> Goede bron                                                                                                                                                                              | <input type="checkbox"/> Geen goede bron  | <input type="checkbox"/> Weet ik niet |                          |
| Fruit                                                                                                                                                              | <input type="checkbox"/> Goede bron                                                                                                                                                                              | <input type="checkbox"/> Geen goede bron  | <input type="checkbox"/> Weet ik niet |                          |
| Boter                                                                                                                                                              | <input type="checkbox"/> Goede bron                                                                                                                                                                              | <input type="checkbox"/> Geen goede bron  | <input type="checkbox"/> Weet ik niet |                          |
| Noten                                                                                                                                                              | <input type="checkbox"/> Goede bron                                                                                                                                                                              | <input type="checkbox"/> Geen goede bron  | <input type="checkbox"/> Weet ik niet |                          |
| <b>24. Het eten van eiwitrijke producten is goed voor:</b>                                                                                                         | <input type="checkbox"/> Spieren<br><input type="checkbox"/> Bloedsuikergehalte<br><input type="checkbox"/> Een goed geheugen<br><input type="checkbox"/> Weet ik niet                                           |                                           |                                       |                          |
| <b>25. Hoe vaak denkt u dat u (vette) vis dient te eten om een gezond voedingspatroon na te streven?</b>                                                           | <input type="checkbox"/> 1 keer per week<br><input type="checkbox"/> 2 keer per week<br><input type="checkbox"/> 3 keer per week<br><input type="checkbox"/> Weet ik niet                                        |                                           |                                       |                          |

|                                                                                                                                         |                                                                                                                                                                                                                                                                                           |
|-----------------------------------------------------------------------------------------------------------------------------------------|-------------------------------------------------------------------------------------------------------------------------------------------------------------------------------------------------------------------------------------------------------------------------------------------|
| <p><b>26. Hoeveel gram groenten denkt u dat u per dag dient te eten om een gezond voedingspatroon na te streven?</b></p>                | <p><input type="checkbox"/> Ten minste 100 gram per dag</p> <p><input type="checkbox"/> Ten minste 200 gram per dag</p> <p><input type="checkbox"/> Ten minste 300 gram per dag</p> <p><input type="checkbox"/> Weet ik niet</p>                                                          |
| <p><b>27. Hoeveel stuks fruit denkt u dat u per dag dient te eten om een gezond voedingspatroon na te streven?</b></p>                  | <p><input type="checkbox"/> 1 stuk per dag</p> <p><input type="checkbox"/> 2 stuks per dag</p> <p><input type="checkbox"/> 3 stuks per dag</p> <p><input type="checkbox"/> Weet ik niet</p>                                                                                               |
| <p><b>28. Het eten van groenten en fruit is goed voor:</b></p>                                                                          | <p><input type="checkbox"/> Het verlagen van het risico op hart- en vaatziekten</p> <p><input type="checkbox"/> Het verlagen van het risico op dementie</p> <p><input type="checkbox"/> Het verlagen van het risico op gewrichtsslijtage</p> <p><input type="checkbox"/> Weet ik niet</p> |
| <p><b>29. Hoeveel gram volkoren graanproducten denkt u dat u per dag dient te eten om een gezond voedingspatroon na te streven?</b></p> | <p><input type="checkbox"/> Ten minste 50 gram per dag</p> <p><input type="checkbox"/> Ten minste 90 gram per dag</p> <p><input type="checkbox"/> Ten minste 200 gram per dag</p> <p><input type="checkbox"/> Weet ik niet</p>                                                            |
| <p><b>30. Wat is de aanbevolen maximale hoeveelheid zout per dag, om een gezond voedingspatroon na te streven?</b></p>                  | <p><input type="checkbox"/> 2 gram per dag</p> <p><input type="checkbox"/> 4 gram per dag</p> <p><input type="checkbox"/> 6 gram per dag</p> <p><input type="checkbox"/> Weet ik niet</p>                                                                                                 |

| VRAGENLIJST - BEWEGING                                                                                                                                                                                                                                           |                                                                                                                                                                                                                                                                                                                                                                                                         |
|------------------------------------------------------------------------------------------------------------------------------------------------------------------------------------------------------------------------------------------------------------------|---------------------------------------------------------------------------------------------------------------------------------------------------------------------------------------------------------------------------------------------------------------------------------------------------------------------------------------------------------------------------------------------------------|
| 31. Kent u de Nederlandse Norm Gezond Bewegen?                                                                                                                                                                                                                   | 1. <input type="checkbox"/> Ja<br>2. <input type="checkbox"/> Nee → Ga dan naar <b>vraag 37</b> .                                                                                                                                                                                                                                                                                                       |
| 32. Toen u voor het eerst van de Nederlandse Norm Gezond Bewegen hoorde, wat heeft u toen met uw beweegpatroon gedaan?                                                                                                                                           | 1. <input type="checkbox"/> Ik heb mijn beweegpatroon aanzienlijk veranderd.<br>2. <input type="checkbox"/> Ik heb mijn beweegpatroon enigszins veranderd.<br>3. <input type="checkbox"/> Ik heb mijn beweegpatroon niet veranderd.                                                                                                                                                                     |
| 33. Denkt u dat u voldoet aan de Nederlandse Norm Gezond Bewegen?                                                                                                                                                                                                | 1. <input type="checkbox"/> Ja → Ga dan naar <b>vraag 36</b> .<br>2. <input type="checkbox"/> Nee                                                                                                                                                                                                                                                                                                       |
| 34. Denkt u dat het mogelijk is voor u om te voldoen aan de Nederlandse Norm Gezond Bewegen?                                                                                                                                                                     | <input type="checkbox"/> Ja, helemaal<br><input type="checkbox"/> Ja, maar dit vergt wel moeite<br><input type="checkbox"/> Nee                                                                                                                                                                                                                                                                         |
| 35. Als u zich meer aan de Nederlandse Norm Gezond Bewegen zou houden, denkt u dat u daar dan gezondheidsvoordeel van zult hebben? Ga naar <b>vraag 37</b> .                                                                                                     | <input type="checkbox"/> Ja<br><input type="checkbox"/> Nee<br><input type="checkbox"/> Weet ik niet                                                                                                                                                                                                                                                                                                    |
| 36. Denkt u dat u baat heeft bij een beweegpatroon dat voldoet aan de Nederlandse Norm Gezond Bewegen?                                                                                                                                                           | 1. <input type="checkbox"/> Ja<br>2. <input type="checkbox"/> Nee                                                                                                                                                                                                                                                                                                                                       |
| 37. Wat denkt u dat de Nederlandse Norm Gezond Bewegen zegt over langdurig zitten?                                                                                                                                                                               | <input type="checkbox"/> Langdurig zitten moet worden voorkomen<br><input type="checkbox"/> Verminder langdurig zitten met ten minste 10 minuten per dag<br><input type="checkbox"/> Verminder langdurig zitten met ten minste 30 minuten per dag<br><input type="checkbox"/> Langdurig zitten moet worden afgewisseld met kortdurende perioden van activiteit<br><input type="checkbox"/> Weet ik niet |
| 38. Is de volgende stelling waar of niet waar?<br><b>Spreads van lichamelijke activiteit over de week is beter dan alles op één dag te doen.</b><br><input type="checkbox"/> Waar<br><input type="checkbox"/> Niet waar<br><input type="checkbox"/> Weet ik niet |                                                                                                                                                                                                                                                                                                                                                                                                         |

|                                                                                                                                         |                                                                                                                                                                                                                                                                                                                                                                                                                                                                                                                                           |
|-----------------------------------------------------------------------------------------------------------------------------------------|-------------------------------------------------------------------------------------------------------------------------------------------------------------------------------------------------------------------------------------------------------------------------------------------------------------------------------------------------------------------------------------------------------------------------------------------------------------------------------------------------------------------------------------------|
| <p><b>39. Welke van de volgende bezigheden vragen een matig-intensieve inspanning?</b><br/><i>Meerdere antwoorden zijn mogelijk</i></p> | <p><input type="checkbox"/> Zittend televisie kijken</p> <p><input type="checkbox"/> Lopen in een normaal tempo</p> <p><input type="checkbox"/> De afwas doen</p> <p><input type="checkbox"/> Dansen</p> <p><input type="checkbox"/> Flink doorfietsen, uw hartslag gaat omhoog</p> <p><input type="checkbox"/> Weet ik niet</p>                                                                                                                                                                                                          |
| <p><b>40. Hoeveel minuten per week moet iemand aan matig-intensieve inspanning doen om een gezond beweegpatroon na te streven?</b></p>  | <p><input type="checkbox"/> Ten minste 60 minuten per week</p> <p><input type="checkbox"/> Ten minste 150 minuten per week</p> <p><input type="checkbox"/> Ten minste 300 minuten per week</p> <p><input type="checkbox"/> Weet ik niet</p>                                                                                                                                                                                                                                                                                               |
| <p><b>41. Hoe lang denkt u dat een activiteit moet duren om te kunnen gelden als matig-intensieve activiteit?</b></p>                   | <p><input type="checkbox"/> Geen vaststaande duur</p> <p><input type="checkbox"/> Ten minste 5 minuten</p> <p><input type="checkbox"/> Ten minste 10 minuten</p> <p><input type="checkbox"/> Weet ik niet</p>                                                                                                                                                                                                                                                                                                                             |
| <p><b>42. Hoeveel extra activiteit is nodig volgens u om gezondheidsvoordeel op te leveren?</b></p>                                     | <p><input type="checkbox"/> Elke extra beweging is bijdragend</p> <p><input type="checkbox"/> Ten minste 5 minuten lichte activiteit</p> <p><input type="checkbox"/> Ten minste 30 minuten lichte activiteit</p> <p><input type="checkbox"/> Ten minste 10 minuten matig-intensieve activiteit</p> <p><input type="checkbox"/> Weet ik niet</p>                                                                                                                                                                                           |
| <p><b>43. Is er volgens u een Nederlandse Norm Gezond Bewegen speciaal voor ouderen?</b></p>                                            | <p><input type="checkbox"/> Ouderen wordt geadviseerd meer spierversterkende oefeningen te doen</p> <p><input type="checkbox"/> Ouderen wordt geadviseerd meer oefeningen te doen die gericht zijn op balans</p> <p><input type="checkbox"/> Ouderen wordt geadviseerd vaker op te staan als zij langdurig zitten</p> <p><input type="checkbox"/> Ouderen wordt geadviseerd om 30 minuten extra matig-intensieve inspanning te verrichten</p> <p><input type="checkbox"/> Die is er niet</p> <p><input type="checkbox"/> Weet ik niet</p> |

**44. Is de volgende stelling waar of niet waar?**

**Bij ouderen geldt: meer bewegen dan noodzakelijk geeft meer gezondheidsvoordelen (hoe meer, hoe beter).**

- Waar
- Niet waar
- Weet ik niet

**45. Welke van de volgende vormen van beweging, indien goed uitgevoerd, is schadelijk voor de gezondheid van ouderen?**

- Matig-intensieve fysieke beweging
- Krachttraining
- Balanstraining
- Geen van de bovenstaande vormen van beweging

**VRAGENLIJST – VITALITEIT**

**46. Bent u het afgelopen jaar ongewenst meer dan 4,5 (viereneenhalve) kg gewicht verloren?**

1.  Ja  
2.  Nee

**47. Omcirkel achter elke uitspraak het cijfer dat het beste uw gevoel of gedrag van de afgelopen week weergeeft.**

|                                                          | Zelden of nooit<br>(minder dan 1 dag) | Soms of weinig<br>(1-2 dagen) | Regelmatig<br>(3-4 dagen) | Meestal of altijd<br>(5-7 dagen) |
|----------------------------------------------------------|---------------------------------------|-------------------------------|---------------------------|----------------------------------|
| Had ik het gevoel dat alles wat ik deed me moeite kostte | 0                                     | 1                             | 2                         | 3                                |
| Kon ik maar niet op gang komen                           | 0                                     | 1                             | 2                         | 3                                |

## Vragenlijst – Activiteiten

### Activiteitenlijst:

Welke activiteiten heeft u in de afgelopen twee weken ondernomen?

|                            |    |     | Hoe vaak heeft u de activiteit gedaan in de afgelopen twee weken? | Hoe lang bent u gemiddeld bezig geweest met deze activiteit? | Hoeveel maanden per jaar doet u deze activiteit? |
|----------------------------|----|-----|-------------------------------------------------------------------|--------------------------------------------------------------|--------------------------------------------------|
|                            | Ja | Nee | Aantal keer                                                       | Gemiddeld aantal minuten                                     | Aantal maanden                                   |
| Wandelen of Nordic Walking |    |     |                                                                   |                                                              |                                                  |
| Huishoudelijke taken       |    |     |                                                                   |                                                              |                                                  |
| Gras maaien                |    |     |                                                                   |                                                              |                                                  |
| Rek- en strek oefeningen   |    |     |                                                                   |                                                              |                                                  |
| Tuinieren                  |    |     |                                                                   |                                                              |                                                  |
| Hiking (wandeltochten)     |    |     |                                                                   |                                                              |                                                  |
| Joggen                     |    |     |                                                                   |                                                              |                                                  |
| Fietsen                    |    |     |                                                                   |                                                              |                                                  |
| Racefietsen                |    |     |                                                                   |                                                              |                                                  |
| Dansen                     |    |     |                                                                   |                                                              |                                                  |
| Aerobics                   |    |     |                                                                   |                                                              |                                                  |
| Bowlen                     |    |     |                                                                   |                                                              |                                                  |
| Golfen                     |    |     |                                                                   |                                                              |                                                  |
| Tennis (enkel)             |    |     |                                                                   |                                                              |                                                  |
| Tennis (dubbel)            |    |     |                                                                   |                                                              |                                                  |
| Squashen                   |    |     |                                                                   |                                                              |                                                  |
| Zwemmen                    |    |     |                                                                   |                                                              |                                                  |



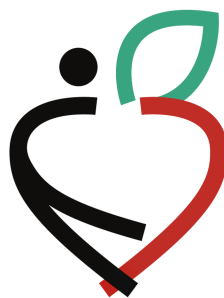

# PANINI

## Checklist deelnemer:

- Vragenlijst – Algemeen**
- Vragenlijst – Voeding**
- Vragenlijst – Beweging**
- Vragenlijst – Vitaliteit**
- Vragenlijst – Activiteiten**
- Scoreformulier – TEST UW VITALITEIT!**  
**Gewicht & Lengte / Handknijpkracht / Loopsnelheid**

Indien er nog missende onderdelen/onbeantwoorde vragen zijn, wilt u deze dan nog doorlopen/beantwoorden?

Bedankt voor uw deelname!
